# Supplementary material for: Ranking hospitals when performance and risk factors are correlated: A simulation-based comparison of risk adjustment approaches for binary outcomes
Source: PLoS One. 2019 Dec 4;14(12):e0225844. doi: 10.1371/journal.pone.0225844 (PMC6892499; doi:10.1371/journal.pone.0225844)
Supplement: S1 Script — (R) [file pone.0225844.s002.R]

setwd("/mnt/rworkspace/martin/simulation_risk_adjustment")

library("parallel")
library("pROC")
library("logistf")
library("pbapply")
library("lme4")
library("mbest")
library("dplyr")
library("coalitions")

################ Overview of parameter (scenarios defined below) #################################
Delta <- 0.5 # maximum difference in mortality due to quality at baseline
rho <- -0.4 # correlation between Q and X.star
eta <- 0.5 # upper bound of hospital-specific term (dgp of X)
sigma <- 1 # upper bound of individual-specific disturbance term
beta2 <- 1 # coefficient of X in eq for Y
nkat <- 10 # number of categories of X.kat in Poisson regression
M0 <- .3 # baseline mortality rate
dgp <- "logit" # data generation process
n <- 1.2*10^4 # number of patients (total)
H <- 2*10^2 # number of hospitals
errors <- "normal"
dens <- "Q.uniform"
minpat <- 15

##################################################################################

load(file = "./data/patients_per_hospital_simulation.RData")

sim.data <- function(Delta,rho,eta,sigma,beta2,nkat,M0,n,H,dgp,patients.per.hospital,errors,dens,minpat,iter){
  
  # number of patients per hospital
  dpat <- patients.per.hospital[[paste0("H",H,"n",n)]]
  
  if(minpat > 1){
    dpat$patients[dpat$patients < minpat] <- minpat
    n.excess <- sum(dpat$patients) - n
    larg.10.perc <- dpat[order(dpat$patients),][(.95*H):H,]
    n.down <- hare_niemeyer(larg.10.perc$patients, larg.10.perc$hid, n.excess)
    dpat$patients[(.95*H):H]  <- dpat$patients[(.95*H):H] - n.down
    
    if(iter == 1){
      if(!dir.exists("./sim_npat")) dir.create("./sim_npat")
      saveRDS(dpat, file = paste0("./sim_npat/patients_final_sim_","H",H,"n",n,".rds"))
    }
  } 
    
  hid <- rep(1:H, dpat$patients)
  
  ##### set parameters of beta distribution #####
  if(dens == "Q.uniform"){
    q1 <- q2 <- 1
  } 
  
  if(dens == "Q.quasinormal"){
    q1 <- q2 <- 6
  }
  
  if(dens == "Q.leftskewed"){
    q1 <- 1
    q2 <- 3
  } 
  
  if(dens == "Q.rightskewed"){
    q1 <- 3
    q2 <- 1
  }
  
  Qh <- rbeta(H,q1,q2)
  Qih <- rep(Qh, dpat$patients)
  
  ####################
  
  if(errors == "normal"){
    gamma <- sign(rho) * sqrt(rho^2/(1-rho^2) * (eta^2+sigma^2)*(q1+q2)^2*(1+q1+q2)/(q1*q2))
    ah <- rnorm(H,0,eta)
    aih <- rep(ah, dpat$patients)
    eih <- rnorm(sum(dpat$patients),0,sigma)
    out.normal <- 1
  }
  
  Xih <- gamma*Qih + aih + eih
  
  if(dgp == "logit"){
    beta1 <- log(Delta)
    beta0 <- qlogis(M0) - q1/(q1+q2)*(beta1+gamma*beta2)
    p.Y <- plogis(beta0 + beta1*Qih + beta2*Xih)
    out.probit <- 0
  }
  

  Y <- sapply(p.Y, function(i) rbinom(1,1,i))
  
  data.frame(hid=hid,Y=Y,p.Y=p.Y,X=Xih,Q=Qih,count=1)
}


###############################

sim.smr <- function(Delta,rho,eta,sigma,beta2,nkat,M0,n,H,dgp,dat.base,errors,dens,minpat){
  
  ##### set parameters of beta distribution #####
  if(dens == "Q.uniform"){
    q1 <- q2 <- 1
    dens.uniform <- 1
    dens.quasinormal <- dens.leftskewed <- dens.rightskewed <- 0
  } 
  
  if(dens == "Q.quasinormal"){
    q1 <- q2 <- 6
    dens.quasinormal <- 1
    dens.uniform <- dens.leftskewed <- dens.rightskewed <- 0
  }
  
  if(dens == "Q.leftskewed"){
    q1 <- 1
    q2 <- 3
    dens.leftskewed <- 1
    dens.uniform <- dens.quasinormal <- dens.rightskewed <- 0
  } 
  
  if(dens == "Q.rightskewed"){
    q1 <- 3
    q2 <- 1
    dens.rightskewed <- 1
    dens.uniform <- dens.quasinormal <- dens.leftskewed <- 0
  }
  
  #############
  if(errors == "normal"){
    gamma <- sign(rho) * sqrt(rho^2/(1-rho^2) * (eta^2+sigma^2)*(q1+q2)^2*(1+q1+q2)/(q1*q2))
    out.normal <- 1
  }
  
  if(dgp == "logit"){
    beta1 <- log(Delta)
    beta0 <- qlogis(M0) - q1/(q1+q2)*(beta1+gamma*beta2)
    out.probit <- 0
  }
  
  out.mean.pY <- mean(dat.base$p.Y)
  
  ex.Qh <- dat.base[,c("hid","Q")][!duplicated(dat.base[,c("hid","Q")]),]
  Qh <- ex.Qh[,"Q"]
  names(Qh) <- ex.Qh[,"hid"]
  
  out.H.check <- length(unique(dat.base$hid))
  out.n.check <- nrow(dat.base)
  
  ### standard logit
  fit.logit <- glm(Y ~ X, family = binomial(link = "logit"), data = dat.base)
  out.r2.logit <- 1 - fit.logit$deviance / fit.logit$null.deviance
  pred.logit <- predict.glm(fit.logit, type = "response")
  dat.base$pred.logit <- pred.logit
  auc.logit <- auc(dat.base$Y, dat.base$pred.logit)[1]
  
  ### random effects logit
  fit.me.logit <- tryCatch(glmer(Y ~ X + (1|hid), family = binomial(link = "logit"), data = dat.base, nAGQ = 0),
                           error = function(e) NULL)
  
  if(!is.null(fit.me.logit)){
    pred.me.logit <- predict(fit.me.logit, type = "response")
    dat.base$pred.me.logit <- pred.me.logit
    
    dat.base$pred.me.logit.null <- predict(fit.me.logit, type = "response", re.form = NA)
  }
  
  ### Fixed effects logit with Firth correction
  fit.firth.dummies <- logistf(Y ~ 0 + factor(hid) + X, data = dat.base, pl = FALSE)
  c.firth.dummies <- coef(fit.firth.dummies)
  pred.firth.dummies <- plogis(model.matrix(Y~ 0 + factor(hid) + X, data = dat.base) %*% c.firth.dummies)
  dat.base$pred.firth.dummies <- pred.firth.dummies
  m.omega <- mean(c.firth.dummies[grepl("hid", names(c.firth.dummies))])
  dat.base$pred.firth.dummies.null <- plogis(m.omega + c.firth.dummies["X"] * dat.base$X)
  
  ################## smr calculation ##################
  dat.mort.smr <- aggregate(cbind(Y,pred.logit,pred.me.logit,pred.firth.dummies,
                                  pred.me.logit.null,pred.firth.dummies.null) ~ hid, 
                            data = dat.base, FUN = mean) %>%
    dplyr::mutate(smr.logit.standard = Y / pred.logit,
                  smr.me.logit = Y / pred.me.logit,
                  smr.firth.dummies = Y / V4,
                  smr.rsmr = pred.me.logit / pred.me.logit.null,
                  smr.fe.rsmr = V4 / pred.firth.dummies.null,
                  smr.fe.excess.raw = Y - pred.firth.dummies.null,
                  smr.fe.excess.pred = V4 - pred.firth.dummies.null,
                  smr.logit.excess = Y - pred.logit,
                  smr.me.logit.excess.raw = Y - pred.me.logit.null,
                  smr.me.logit.excess.pred = pred.me.logit - pred.me.logit.null) %>% 
    select(hid,Y,smr.logit.standard:smr.me.logit.excess.pred) %>% 
    rename(rawmort = Y) %>%
    arrange(hid) 

    dat.final <- data.frame(Q = Qh,
                          dat.mort.smr)
    dat.final$hid <- NULL


    
  dat.final$hid <- 1:H
  allmeth <- setdiff(colnames(dat.final),c("Q","hid"))
  if(is.null(fit.me.logit)) allmeth <- setdiff(allmeth, "smr.me.logit")
  
  ###### correctly clasified quintiles ###########
  class.quintiles <- vector(length = length(allmeth))
  q.q <- cut(rank(dat.final$Q, ties.method = "first"),
              breaks = quantile(rank(dat.final$Q, , ties.method = "first"), 
                                 probs = seq(0,1,.2)), include.lowest = TRUE, labels = 1:5)
  iter <- 1
  for(v in allmeth){
    class.quintiles[iter] <- mean(
       q.q == cut(rank(-dat.final[,v], ties.method = "first"), 
                  breaks = quantile(rank(-dat.final[,v], ties.method = "first"), 
                                    probs = seq(0,1,.2)), include.lowest = TRUE, labels = 1:5)
    )
    iter <- iter + 1
  }
  
  names(class.quintiles) <- paste0("quintiles.",allmeth)
  
  
   # statistics to check validity of calculations
  valid.corr.X.Q <- cor(dat.base$X,dat.base$Q)

    c(class.quintiles, Delta = Delta, rho = rho, eta = eta, 
      beta2 = beta2, nkat = nkat, M0 = M0, n = n, H = H, sigma = sigma, gamma = gamma,
    dens.leftskewed=dens.leftskewed, dens.uniform=dens.uniform, dens.quasinormal = dens.quasinormal,
    dens.rightskewed = dens.rightskewed, minpat = minpat, valid.corr.X.Q = valid.corr.X.Q)
}


####################### szenarios #######################


############### baseline #################
  sz.rho <- c(-.8, -.6, -.3, 0, .3, .6, .8)
  sz.n <- c(10^4)
  #sz.n <- c(8*10^3)
  sz.Delta <- c(.5) # (Odds Ratio)
  #sz.Delta <- c(-.15)
  sz.eta <- c(.2)
  sz.sigma <- c(.6)
  #sz.eta <- c(.2)
  sz.dgp <- c("logit")
  sz.H <- c(200)
  #sz.H <- c(100)
  sz.beta2 <- c(1)
  sz.nkat <- 10 
  sz.M0 <- c(.2)
  sz.errors <- c("normal")
  sz.dens <- c("Q.quasinormal")
  sz.minpat <- c(15)
  

szenarios.base <- expand.grid(sz.rho = sz.rho,
                              sz.n = sz.n,
                              sz.Delta = sz.Delta,
                              sz.eta = sz.eta,
                              sz.dgp = sz.dgp,
                              sz.H = sz.H,
                              sz.sigma = sz.sigma,
                              sz.beta2 = sz.beta2,
                              sz.nkat = sz.nkat,
                              sz.M0 = sz.M0,
                              sz.errors = sz.errors,
                              sz.dens = sz.dens,
                              sz.minpat = sz.minpat)

### sensitivity ###

# S1: Quality distributions
szenarios.sens.1 <- expand.grid(sz.rho = sz.rho,
                                sz.n = sz.n,
                                sz.Delta = sz.Delta,
                                sz.eta = sz.eta,
                                sz.dgp = sz.dgp,
                                sz.H = sz.H,
                                sz.sigma = sz.sigma,
                                sz.beta2 = sz.beta2,
                                sz.nkat = sz.nkat,
                                sz.M0 = sz.M0,
                                sz.errors = sz.errors,
                                sz.dens = c("Q.uniform","Q.leftskewed","Q.rightskewed"),
                                sz.minpat = sz.minpat)


# S2: n
szenarios.sens.2 <- expand.grid(sz.rho = sz.rho,
                                sz.n = c(8*10^3, 1.2*10^4, 10^5),
                                sz.Delta = sz.Delta,
                                sz.eta = sz.eta,
                                sz.dgp = sz.dgp,
                                sz.H = sz.H,
                                sz.sigma = sz.sigma,
                                sz.beta2 = sz.beta2,
                                sz.nkat = sz.nkat,
                                sz.M0 = sz.M0,
                                sz.errors = sz.errors,
                                sz.dens = sz.dens,
                                sz.minpat = sz.minpat)

# S3: Baseline mortality
szenarios.sens.3 <- expand.grid(sz.rho = sz.rho,
                                sz.n = sz.n,
                                sz.Delta = sz.Delta,
                                sz.eta = sz.eta,
                                sz.dgp = sz.dgp,
                                sz.H = sz.H,
                                sz.sigma = sz.sigma,
                                sz.beta2 = sz.beta2,
                                sz.nkat = sz.nkat,
                                sz.M0 = c(.1,.3),
                                sz.errors = sz.errors,
                                sz.dens = sz.dens,
                                sz.minpat = sz.minpat)

# S4: Quality effects (Delta)
szenarios.sens.4 <- expand.grid(sz.rho = sz.rho,
                                sz.n = sz.n,
                                sz.Delta = c(.3, .7),
                                sz.eta = sz.eta,
                                sz.dgp = sz.dgp,
                                sz.H = sz.H,
                                sz.sigma = sz.sigma,
                                sz.beta2 = sz.beta2,
                                sz.nkat = sz.nkat,
                                sz.M0 = sz.M0,
                                sz.errors = sz.errors,
                                sz.dens = sz.dens,
                                sz.minpat = sz.minpat)

# S5: minpat
szenarios.sens.5 <- expand.grid(sz.rho = sz.rho,
                                sz.n = sz.n,
                                sz.Delta = sz.Delta,
                                sz.eta = sz.eta,
                                sz.dgp = sz.dgp,
                                sz.H = sz.H,
                                sz.sigma = sz.sigma,
                                sz.beta2 = sz.beta2,
                                sz.nkat = sz.nkat,
                                sz.M0 = sz.M0,
                                sz.errors = sz.errors,
                                sz.dens = sz.dens,
                                sz.minpat = c(5,10,20))

r <- 10^3 # number of mc draws

outpath <- paste0(getwd(),"/sim_data")
respath <- paste0(getwd(),"/mc_out")

### combine szenarios ###
szenarios <- do.call(rbind, lapply(ls()[grepl("szenarios",ls())], function(i) get(i)))
######################################
  
dim(szenarios)

ncores <- 20

set.seed(42)

##############################################################################

### data generation ###
mclapply(X=1:nrow(szenarios), function(i){
  Delta = szenarios$sz.Delta[i]
  rho = szenarios$sz.rho[i]
  eta = szenarios$sz.eta[i]
  sigma = szenarios$sz.sigma[i]
  beta2 = szenarios$sz.beta2[i]
  nkat = szenarios$sz.nkat[i]
  M0 = szenarios$sz.M0[i]
  n = szenarios$sz.n[i]
  H = szenarios$sz.H[i]
  dgp = szenarios$sz.dgp[i]
  errors = as.character(szenarios$sz.errors[i])
  dens = as.character(szenarios$sz.dens[i])
  minpat = szenarios$sz.minpat[i]
  patients.per.hospital = patients.per.hospital
  
  x <- lapply(1:r, function(v){
    sim.data(Delta,rho,eta,sigma,beta2,nkat,M0,n,H,dgp,patients.per.hospital,errors,dens,minpat,iter=v)
  })
  
  if(!dir.exists(outpath)) dir.create(outpath)
  saveRDS(x, file = paste0(outpath,"/","sim_dataset_",i,".rds"))
},
mc.cores = ncores)

#########################################################################################

### estimation ###
res.list <- lapply(1:nrow(szenarios), function(i){
  Delta = szenarios$sz.Delta[i]
  rho = szenarios$sz.rho[i]
  eta = szenarios$sz.eta[i]
  sigma = szenarios$sz.sigma[i]
  beta2 = szenarios$sz.beta2[i]
  nkat = szenarios$sz.nkat[i]
  M0 = szenarios$sz.M0[i]
  n = szenarios$sz.n[i]
  H = szenarios$sz.H[i]
  dgp = szenarios$sz.dgp[i]
  errors = as.character(szenarios$sz.errors[i])
  dens = as.character(szenarios$sz.dens[i])
  minpat = szenarios$sz.minpat[i]
  
  dat.full <- readRDS(file = paste0(outpath,"/","sim_dataset_",i,".rds"))
  
  x <- mclapply(X=1:r, function(v){
    sim.smr(Delta,rho,eta,sigma,beta2,nkat,M0,n,H,dgp,dat.base=dat.full[[v]],errors,dens,minpat)
  },
  mc.cores = ncores)
  
  if(!dir.exists(respath)) dir.create(respath)
  saveRDS(x, file = paste0(respath,"/","results_full_szenario_",i,".rds"))
})


           
